# Supplementary material
Source: PubMed Central journal article supplement (PMC8127394)
Supplement: NIHMS1687944-supplement-Supplementary_Material.pdf [file NIHMS1687944-supplement-Supplementary_Material.pdf]

## Supplementary Online Content

### Automated frailty screening at-scale for pre-operative risk stratification using the electronic frailty index

Kathryn E. Callahan, MD, MS, Clancy J. Clark, MD, Angela F. Edwards, MD, Timothy N. Harwood, MD, Jeff D. Williamson, MD, MHS, Adam W. Moses, MHA, PMP, James J. Willard, MAS, Joseph A. Cristiano, MD, Kellie Meadows, MSW, Justin Hurie, MD, Kevin P. High, MD, MS, J. Wayne Meredith, MD and Nicholas M. Pajewski, PhD

**Supplementary FIGURE SF1.** Electronic Frailty Index Components Derived from the Electronic Health Record

**Supplementary FIGURE SF2.** Construction of Patient Cohort

**Supplementary TABLE ST1.** Top ten most frequent surgical procedures by service line

**Supplementary TABLE ST2.** Demographic and clinical variables stratified by availability of the electronic Frailty Index (eFI) within the electronic health record

**Supplementary TABLE ST3.** Length of stay and discharge destination following surgery by ASA Class and frailty status based on the electronic Frailty Index (eFI)

**Supplementary TABLE ST4.** 30-day readmissions and all-cause mortality following surgery by ASA Class and frailty status based on the electronic Frailty Index (eFI)

**Supplementary TABLE ST5.** Discrimination for all-cause mortality, 30-day readmission, and need post-acute care services based on the electronic Frailty Index (eFI)

**Supplementary FIGURE SF1.** Electronic Frailty Index Components Derived from the Electronic Health Record

| <b>Chronic conditions (Diagnosis Codes)</b>                             |
|-------------------------------------------------------------------------|
| 1. Anemia                                                               |
| 2. Rheumatoid arthritis or osteoarthritis                               |
| 3. Atrial fibrillation                                                  |
| 4. Stroke or transient ischemic attack                                  |
| 5. Renal disease                                                        |
| 6. Diabetes                                                             |
| 7. Dizziness or vertigo                                                 |
| 8. Dyspnea                                                              |
| 9. Falls                                                                |
| 10. Fragility or fracture                                               |
| 11. Hearing impairment                                                  |
| 12. Congestive heart failure                                            |
| 13. Valvular disease                                                    |
| 14. Hypertension                                                        |
| 15. Hypotension or syncope                                              |
| 16. Myocardial infarction                                               |
| 17. Coronary atherosclerosis & other heart disease                      |
| 18. Melanoma                                                            |
| 18. Blood-related cancer                                                |
| 18. Cancer (Excluding melanoma, skin cancers, or blood-related cancers) |
| 19. Dementia                                                            |
| 20. Osteoporosis                                                        |
| 21. Parkinson's disease                                                 |
| 22. Peptic ulcer                                                        |
| 23. Peripheral vascular disease                                         |
| 24. Pulmonary disease                                                   |
| 25. Skin ulcer                                                          |
| 26. Thyroid disease                                                     |
| 27. Urinary incontinence                                                |
| 28. Urinary system disease                                              |
| 29. Blindness or other vision defects                                   |
| 30. Weight loss                                                         |
| 31. Depression                                                          |
| 32. Mild liver disease                                                  |
| 32. Moderate to severe liver disease                                    |
| 33. Chronic pain                                                        |

| <b>Vital Signs</b>                      |
|-----------------------------------------|
| 34. Body mass index (Obesity)           |
| 35. Body mass index (Underweight)       |
| 14. Systolic & diastolic blood pressure |

| <b>Laboratory measurements</b>          |
|-----------------------------------------|
| 5. Estimated glomerular filtration rate |
| 36. Total cholesterol                   |
| 37. HDL cholesterol                     |
| 38. Triglycerides                       |
| 39. Potassium                           |
| 40. Sodium                              |
| 32. Aspartate aminotransferase          |
| 41. Mean corpuscular volume             |
| 42. Blood urea nitrogen                 |
| 43. Calcium                             |
| 44. Albumin                             |
| 45. Total protein                       |
| 46. Alkaline phosphatase                |
| 47. Hemoglobin                          |
| 6. Glucose                              |

| <b>Function (Medicare Annual Wellness Visit)</b>  |
|---------------------------------------------------|
| 48. Activities of daily living                    |
| 49. Instrumental activities of daily living       |
| 50. Self-reported health status                   |
| 51. Chair rise                                    |
| 19. Diagnosis of dementia or cognitive impairment |
| 11. Hearing concerns / use of hearing aid         |
| 52. Stress                                        |
| 33. Pain                                          |

| <b>Other</b>       |
|--------------------|
| 53. Smoking status |
| 54. Polypharmacy   |

**Supplementary FIGURE SF2.** Construction of Patient Cohort

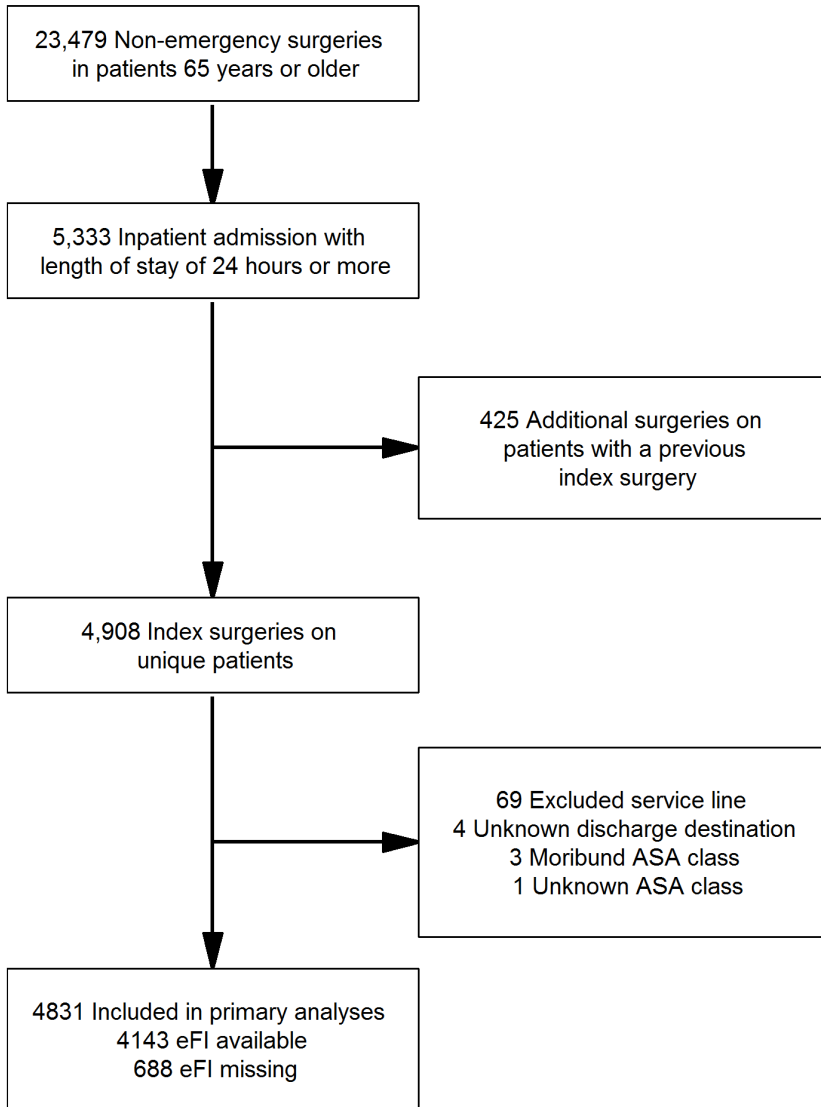

ASA denotes American Society of Anesthesiologists and eFI electronic Frailty Index.

Excluded service lines (due to low volume of surgeries requiring an inpatient admission): Electroconvulsive Therapy (N= 7), Emergency General Surgery (N=7), Ophthalmology (N=16), Podiatry (N=9), Pulmonary (N=2), Transplant (N=9), and Trauma (N=19).

**Supplementary TABLE ST1.** Top ten most frequent surgical procedures by service line

| Service Line                                 | Procedure                                            | No. (%)    | Service Line                        | Procedure                                          | No. (%)    |
|----------------------------------------------|------------------------------------------------------|------------|-------------------------------------|----------------------------------------------------|------------|
| <b>Cardiothoracic<br/>(No. = 637)</b>        | CABG ON PUMP - CORONARY ARTERY BYPASS GRAFT          | 183 (28.7) | <b>Orthopedics<br/>(No. = 1530)</b> | TOTAL KNEE ARTHROPLASTY                            | 626 (40.9) |
|                                              | WEDGE RESECTION ROBOTIC                              | 83 (13.0)  |                                     | TOTAL HIP REPLACEMENT- ANTERIOR APPROACH           | 206 (13.5) |
|                                              | AORTIC VALVE REPLACEMENT                             | 76 (11.9)  |                                     | TOTAL HIP REPLACEMENT - POSTERIOR APPROACH         | 174 (11.4) |
|                                              | LUNG LOBECTOMY ROBOTIC                               | 70 (11)    |                                     | TOTAL KNEE REVISION                                | 83 (5.4)   |
|                                              | CABG OFF PUMP                                        | 34 (5.3)   |                                     | TOTAL SHOULDER REVERSE ARTHROPLASTY                | 59 (3.9)   |
|                                              | VATS / WEDGE RESECTION                               | 27 (4.2)   |                                     | TOTAL HIP REVISION                                 | 48 (3.1)   |
|                                              | MITRAL VALVE REPLACEMENT MVR                         | 26 (4.1)   |                                     | TOTAL SHOULDER ARTHROPLASTY                        | 29 (1.9)   |
|                                              | MINIMALLY INVASIVE MITRAL VALVE REPAIR / REPLACEMENT | 23 (3.6)   |                                     | SHOULDER TOTAL UNCEMENTED                          | 27 (1.8)   |
|                                              | MEDIASTINAL MASS RESECTION ROBOTIC                   | 10 (1.6)   |                                     | LUMBAR METREX DISCECTOMY                           | 18 (1.2)   |
|                                              | VIDEO ASSISTED THORACIC SURGERY                      | 10 (1.6)   |                                     | POSTERIOR LUMBAR LAMINECTOMY                       | 15 (1.0)   |
| <b>Ear, Nose, and Throat<br/>(No. = 327)</b> | PAROTIDECTOMY                                        | 50 (15.3)  | <b>Plastics<br/>(No. = 65)</b>      | DEBRIDEMENT SACRAL WOUND                           | 7 (10.8)   |
|                                              | LARYNGOSCOPY DIRECT                                  | 23 (7.0)   |                                     | IRRIGATION & DEBRIDEMENT FOOT / ANKLE              | 4 (6.2)    |
|                                              | GLOSSECTOMY PARTIAL                                  | 20 (6.1)   |                                     | IRRIGATION AND DEBRIDEMENT LOWER EXTREMITY         | 4 (6.2)    |
|                                              | SELECTIVE NECK DISSECTION                            | 20 (6.1)   |                                     | IRRIGATION & DEBRIDEMENT HAND                      | 3 (4.6)    |
|                                              | MAXILLECTOMY                                         | 15 (4.6)   |                                     | IRRIGATION & DEBRIDEMENT LEG                       | 3 (4.6)    |
|                                              | MANDIBULECTOMY (PARTIAL) WITH PLATING                | 13 (4.0)   |                                     | AMPUTATION BELOW KNEE                              | 2 (3.1)    |
|                                              | THYROIDECTOMY                                        | 12 (3.7)   |                                     | DEBRIDEMENT OPEN WOUND EACH ADDL 20 SQ CM (ADD-ON) | 2 (3.1)    |
|                                              | LARYNGECTOMY TOTAL                                   | 10 (3.1)   |                                     | IRRIGATION & DEBRIDEMENT UPPER EXTREMITY           | 2 (3.1)    |

|                                            |                                                                  |                          |                                 |                                                                                                               |               |
|--------------------------------------------|------------------------------------------------------------------|--------------------------|---------------------------------|---------------------------------------------------------------------------------------------------------------|---------------|
|                                            | NECK DISSECTION MODIFIED<br>RADICAL <6HRS                        | 8 (2.4)                  |                                 | MOHS DEFECT REPAIR                                                                                            | 2 (3.1)       |
|                                            | TRACHEOTOMY                                                      | 8 (2.4)                  |                                 | ORIF MANDIBLE / MIDFACE                                                                                       | 2 (3.1)       |
| <b>General<br/>Surgery<br/>(No. = 624)</b> | RIGHT HEMICOLECTOMY<br>LAPAROSCOPIC                              | 33 (5.3)                 | <b>Urology<br/>(No. = 390)</b>  | PROSTATECTOMY RADICAL W/<br>LYMPHADENECTOMY<br>LAPAROSCOPIC ROBOT ASSISTED                                    | 110<br>(28.2) |
|                                            | SIGMOID COLECTOMY<br>LAPAROSCOPIC ASSISTED                       | 32 (5.1)                 |                                 | NEPHRECTOMY PARTIAL ROBOTIC                                                                                   | 45 (11.5)     |
|                                            | PARAESOPHAGEAL HERNIA REPAIR<br>LAPAROSCOPIC                     | 31 (5.0)                 |                                 | NEPHRECTOMY RADICAL<br>ROBOTIC                                                                                | 33 (8.5)      |
|                                            | WHIPPLE PROCEDURE                                                | 31 (5.0)                 |                                 | CYSTECTOMY W/ ILEAL CONDUIT<br>DIVERSION L1                                                                   | 17 (4.4)      |
|                                            | HYPERTHERMIC INTRAPERITONEAL<br>CHEMOTHERAPY - MAJOR             | 27 (4.3)                 |                                 | PROSTATECTOMY SIMPLE -<br>ROBOT ASSISTED                                                                      | 14 (3.6)      |
|                                            | LAPAROTOMY EXPLORATORY                                           | 22 (3.5)                 |                                 | NEPHRECTOMY PARTIAL W/<br>INTRAOP ULTRASOUND AND<br>INTERPRETATION & INDOCYANINE<br>GREEN FLUOROSCENCE IMAGIN | 11 (2.8)      |
|                                            | DIAGNOSTIC LAPAROSCOPY                                           | 18 (2.9)                 |                                 | PROSTATECTOMY SIMPLE                                                                                          | 10 (2.6)      |
|                                            | CHOLECYSTECTOMY<br>LAPAROSCOPIC W/<br>CHOLANGIOGRAM              | 14 (2.2)                 |                                 | NEPHRECTOMY PARTIAL                                                                                           | 9 (2.3)       |
|                                            | COMPONENT SEPARATION OPEN                                        | 14 (2.2)                 |                                 | PROSTATECTOMY<br>LAPAROSCOPIC ROBOTIC                                                                         | 9 (2.3)       |
| COLOSTOMY CLOSURE                          | 12 (1.9)                                                         | NEPHRECTOMY RADICAL OPEN | 8 (2.1)                         |                                                                                                               |               |
| <b>Gynecology<br/>(No. = 137)</b>          | HYSTERECTOMY TOTAL ABDOMINAL                                     | 38 (27.7)                | <b>Vascular<br/>(No. = 310)</b> | CAROTID ENDARTERECTOMY                                                                                        | 84 (27.1)     |
|                                            | LAPAROTOMY EXPLORATORY                                           | 25 (18.2)                |                                 | PERCUTANEOUS AORTIC<br>ENDOGRAFT                                                                              | 31 (10.0)     |
|                                            | HYSTERECTOMY TOTAL ROBOTIC                                       | 10 (7.3)                 |                                 | AORTIC ENDOGRAFT                                                                                              | 25 (8.1)      |
|                                            | HYSTERECTOMY ABDOMINAL                                           | 7 (5.1)                  |                                 | FEMORAL ARTERY<br>ENDARTERECTOMY                                                                              | 18 (5.8)      |
|                                            | SACRO-SPINAL LIG. SUSP./A&P<br>REPAIR/URETHRAL SLING             | 5 (3.6)                  |                                 | ANEURYSM ABDOMINAL AORTA<br>REPAIR (AAA)                                                                      | 16 (5.2)      |
|                                            | LAPAROTOMY EXPLORATORY /<br>TUMOR DEBULKING / BOWEL<br>RESECTION | 4 (2.9)                  |                                 | AMPUTATION ABOVE KNEE                                                                                         | 14 (4.5)      |

|                             |                                                          |          |  |                            |          |
|-----------------------------|----------------------------------------------------------|----------|--|----------------------------|----------|
|                             | EXAM UNDER ANESTHESIA (EUA)                              | 3 (2.2)  |  | FEMORAL DISTAL BYPASS      | 14 (4.5) |
|                             | HYSTERECTOMY ABD / BSO /<br>OMENECTOMY / NODE DISSECTION | 3 (2.2)  |  | ARTERIOGRAM                | 13 (4.2) |
|                             | HYSTERECTOMY VAGINAL                                     | 3 (2.2)  |  | FEMORAL ARTERY ARTERIOGRAM | 11 (3.5) |
|                             | HYSTERECTOMY VAGINAL / BSO /<br>A&P REPAIR               | 3 (2.2)  |  | FEMORAL POPLITEAL BYPASS   | 8 (2.6)  |
| Neurosurgery<br>(No. = 811) | PLIF - POSTERIOR LUMBAR<br>INTERBODY FUSION MULTI LEVEL  | 76 (9.4) |  |                            |          |
|                             | DEEP BRAIN STIMULATOR PHASE 1<br>ELECTRODE PLACEMENT     | 74 (9.1) |  |                            |          |
|                             | ANTERIOR CERVICAL DISCECTOMY &<br>FUSION MULTI LEVEL     | 56 (6.9) |  |                            |          |
|                             | TRANSFORAMINAL LUMBAR<br>INTERBODY FUSION                | 43 (5.3) |  |                            |          |
|                             | SPINAL FUSION POSTERIOR                                  | 39 (4.8) |  |                            |          |
|                             | VP SHUNT (VENTRICULO-<br>PERITONEAL)                     | 36 (4.4) |  |                            |          |
|                             | MAST MIDLINE PLIF                                        | 34 (4.2) |  |                            |          |
|                             | LUMBAR LAMINECTOMY MULTI<br>LEVEL                        | 32 (3.9) |  |                            |          |
|                             | ANTERIOR CERVICAL DISCECTOMY &<br>FUSION /W PLATES       | 25 (3.1) |  |                            |          |
|                             | CRANIOTOMY FOR TUMOR                                     | 25 (3.1) |  |                            |          |

**Supplementary TABLE ST2.** Demographic and clinical variables stratified by availability of the electronic Frailty Index (eFI) within the electronic health record

| Characteristic                                    | eFI            |                  |                           | P value |
|---------------------------------------------------|----------------|------------------|---------------------------|---------|
|                                                   | Overall        | Available        | Insufficient Data for eFI |         |
|                                                   | N = 4831       | N = 4143         | N = 688                   |         |
| Age, years, Mean (SD)                             | 73.2 (5.9)     | 73.1 (5.8)       | 73.5 (6.4)                | 0.13    |
| Male sex, No. (%)                                 | 2550 (52.8)    | 2145 (51.8)      | 405 (58.9)                | 0.001   |
| Race / Ethnicity, No. (%)                         |                |                  |                           | 0.18    |
| White                                             | 4226 (87.5)    | 3619 (87.4)      | 607 (88.2)                |         |
| Black or African-American                         | 461 (9.5)      | 407 (9.8)        | 54 (7.8)                  |         |
| Hispanic                                          | 55 (1.1)       | 45 (1.1)         | 10 (1.5)                  |         |
| Other                                             | 89 (1.8)       | 72 (1.7)         | 17 (2.5)                  |         |
| Weighted Charlson Comorbidity Index, median [IQR] | 1 [0 to 3]     | 1 [0 to 3]       | 0 [0 to 2]                | <0.001  |
| ASA Class, No. (%)                                |                |                  |                           | <0.001  |
| No disease (I) or mild systemic disease (II)      | 824 (17.1)     | 687 (16.6)       | 137 (19.9)                |         |
| Severe systemic disease(III)                      | 3175 (65.7)    | 2806 (67.7)      | 369 (53.6)                |         |
| Life-threatening systemic disease (IV)            | 832 (17.2)     | 650 (15.7)       | 182 (26.5)                |         |
| Operating room service line, No. (%)              |                |                  |                           | <0.001  |
| Orthopedics                                       | 1530 (31.7)    | 1373 (33.1)      | 157 (22.8)                |         |
| Neurosurgery                                      | 811 (16.8)     | 714 (17.2)       | 97 (14.1)                 |         |
| Cardiothoracic                                    | 637 (13.2)     | 500 (12.1)       | 137 (19.9)                |         |
| General surgery                                   | 624 (12.9)     | 565 (13.6)       | 59 (8.6)                  |         |
| Urology                                           | 390 (8.1)      | 317 (7.7)        | 73 (10.6)                 |         |
| Ear, Nose, and Throat                             | 327 (6.8)      | 240 (5.8)        | 87 (12.6)                 |         |
| Vascular                                          | 310 (6.4)      | 269 (6.5)        | 41 (6.0)                  |         |
| Gynecology                                        | 137 (2.8)      | 120 (2.9)        | 17 (2.5)                  |         |
| Plastics                                          | 65 (1.3)       | 45 (1.1)         | 20 (2.9)                  |         |
| Length of stay, hours, median [IQR]               | 76 [36 to 150] | 75 [34 to 142.5] | 101.5 [51 to 208]         | <0.001  |
| Frailty status, No. (%)                           |                |                  |                           | <0.001  |
| Fit (eFI≤0.10)                                    |                | 1410 (34.0)      |                           |         |
| Pre-Frail (0.10<eFI≤0.21)                         |                | 2109 (50.9)      |                           |         |
| Frail (eFI>0.21)                                  |                | 624 (15.1)       |                           |         |

SD denotes Standard Deviation, IQR Interquartile Range, and ASA denotes American Society of Anesthesiologists.

**Supplementary TABLE ST3.** Length of stay and discharge destination following surgery by ASA class and frailty status based on the electronic Frailty Index (eFI)

| ASA Class                                  | Frailty Status <sup>a</sup> | No.  | Length of Stay (Hours)<br>Median [IQR] | Discharge Destination |                                         |                       |             | Odds Ratio (95% CI) <sup>c</sup> |
|--------------------------------------------|-----------------------------|------|----------------------------------------|-----------------------|-----------------------------------------|-----------------------|-------------|----------------------------------|
|                                            |                             |      |                                        | Died in Hospital      | Transitional Care Facility <sup>b</sup> | Home With Home Health | Home        |                                  |
| No disease or mild systemic disease (I/II) | Fit                         | 380  | 35 (29 – 71)                           | 0 (0.0)               | 25 (6.6)                                | 40 (10.5)             | 315 (82.9)  | -                                |
|                                            | Pre-Frail                   | 283  | 42 (29 - 73)                           | 1 (0.4)               | 20 (7.1)                                | 25 (8.8)              | 237 (83.7)  | 0.84 (0.55 – 1.30)               |
|                                            | Frail                       | 24   | 33 (29 – 55.5)                         | 0 (0.0)               | 2 (8.3)                                 | 1 (4.2)               | 21 (87.5)   | 0.60 (0.17 – 2.15)               |
|                                            | eFI missing                 | 137  | 48 (30 – 79)                           | 0 (0.0)               | 19 (13.9)                               | 15 (10.9)             | 103 (75.2)  | 1.64 (1.00 – 2.68)               |
| Severe systemic disease (III)              | Fit                         | 881  | 74 (47 – 129)                          | 9 (1.0)               | 101 (11.5)                              | 148 (16.8)            | 623 (70.7)  | -                                |
|                                            | Pre-Frail                   | 1497 | 74 (36 – 127)                          | 7 (0.5)               | 228 (15.2)                              | 261 (17.4)            | 1001 (66.9) | 1.09 (0.90 – 1.32)               |
|                                            | Frail                       | 428  | 79 (49 – 129)                          | 4 (0.9)               | 105 (24.5)                              | 88 (20.6)             | 231 (54.0)  | 1.75 (1.36 – 2.26)               |
|                                            | eFI missing                 | 369  | 81 (51 – 189)                          | 2 (0.5)               | 75 (20.3)                               | 61 (16.5)             | 231 (62.6)  | 1.35 (1.03 – 1.78)               |
| Life-threatening systemic disease (IV)     | Fit                         | 149  | 156 (106 – 249)                        | 1 (0.7)               | 38 (25.5)                               | 20 (13.4)             | 90 (60.4)   | -                                |
|                                            | Pre-Frail                   | 329  | 147 (81 – 221)                         | 5 (1.5)               | 72 (21.9)                               | 73 (22.2)             | 179 (54.4)  | 1.34 (0.89 – 2.02)               |
|                                            | Frail                       | 172  | 152 (81 – 250)                         | 10 (5.8)              | 60 (43.9)                               | 28 (16.3)             | 74 (43.0)   | 1.93 (1.21 – 3.08)               |
|                                            | eFI missing                 | 182  | 196 (131 – 347)                        | 7 (3.8)               | 63 (34.6)                               | 35 (19.2)             | 77 (42.3)   | 2.10 (1.33 – 3.30)               |

ASA denotes American Society of Anesthesiologists, CI Confidence Interval, and IQR Interquartile Range.

<sup>a</sup>Frailty status defined as Fit (eFI≤0.10), Pre-Frail (0.10<eFI≤0.21), or Frail (eFI>0.21).

<sup>b</sup>Transitional Care Facility includes inpatient rehabilitation, skilled nursing facility, hospice, other long-term acute care or intermediate care facility, or transfer to another hospital.

<sup>c</sup>Denotes adjusted odds ratio for the probability of dying in hospital, being discharged to transitional care facility, or being discharged home with home health (versus being discharged home without home health) based on a mixed-effects logistic regression model with a service line random effect, adjusting for age, sex, and race/ethnicity. For ASA class of no disease or mild systemic disease, due to model instability, estimates based on logistic regression without service line random effect.



**Supplementary TABLE ST4.** 30-day readmissions and all-cause mortality following surgery by ASA Class and frailty status based on the electronic Frailty Index (eFI)

| ASA Class                                  | Frailty Status <sup>a</sup> | 30-day Readmission |           |                                  | All-Cause Mortality |                      |                       |                                    |
|--------------------------------------------|-----------------------------|--------------------|-----------|----------------------------------|---------------------|----------------------|-----------------------|------------------------------------|
|                                            |                             | No. <sup>b</sup>   | No. (%)   | Odds Ratio (95% CI) <sup>c</sup> | No.                 | 30-day No. (Cum Inc) | 180-day No. (Cum Inc) | Hazard Ratio (95% CI) <sup>d</sup> |
| No disease or mild systemic disease (I/II) | Fit                         | 380                | 10 (2.6)  | -                                | 380                 | 0 (0.0)              | 1 (0.3)               | -                                  |
|                                            | Pre-Frail                   | 282                | 13 (4.6)  | 1.82 (0.78 – 4.21)               | 283                 | 1 (0.4)              | 3 (1.1)               | 4.14 (0.43 – 39.79)                |
|                                            | Frail                       | 24                 | 0 (0.0)   | Not Estimable                    | 24                  | 0 (0.0)              | 0 (0.0)               | Not Estimable                      |
|                                            | eFI missing                 | 137                | 6 (4.4)   | 1.67 (0.59 – 4.70)               | 137                 | 1 (0.7)              | 2 (1.5)               | 4.72 (0.43 – 52.23)                |
| Severe systemic disease (III)              | Fit                         | 872                | 50 (5.7)  | -                                | 881                 | 12 (1.4)             | 27 (3.1)              | -                                  |
|                                            | Pre-Frail                   | 1490               | 99 (6.6)  | 1.25 (0.88 – 1.78)               | 1497                | 15 (1.0)             | 56 (3.8)              | 1.32 (0.83 – 2.09)                 |
|                                            | Frail                       | 424                | 44 (10.4) | 2.21 (1.44 – 3.39)               | 428                 | 8 (1.9)              | 25 (6.0)              | 2.29 (1.32 – 3.97)                 |
|                                            | eFI missing                 | 367                | 23 (6.3)  | 1.13 (0.68 – 1.89)               | 369                 | 3 (0.8)              | 25 (7.0)              | 2.05 (1.18 – 3.56)                 |
| Life-threatening systemic disease (IV)     | Fit                         | 148                | 10 (6.8)  | -                                | 149                 | 2 (1.4)              | 7 (4.8)               | -                                  |
|                                            | Pre-Frail                   | 324                | 38 (11.7) | 1.87 (0.91 – 3.87)               | 329                 | 7 (2.2)              | 27 (8.6)              | 1.80 (0.78 – 4.15)                 |
|                                            | Frail                       | 162                | 31 (19.1) | 3.46 (1.63 – 7.36)               | 172                 | 9 (5.4)              | 31 (19.9)             | 3.94 (1.72 – 9.03)                 |
|                                            | eFI missing                 | 175                | 12 (6.9)  | 1.04 (0.44 – 2.48)               | 182                 | 8 (4.5)              | 20 (11.6)             | 2.42 (1.02 – 5.74)                 |

ASA denotes American Society of Anesthesiologists, CI Confidence Interval, and Cum Inc Cumulative Incidence.

<sup>a</sup>Frailty status defined as Fit (eFI≤0.10), Pre-Frail (0.10<eFI≤0.21), or Frail (eFI>0.21).

<sup>b</sup>Patients discharged alive from hospital admission for index surgery.

<sup>c</sup>Denotes adjusted odds ratio for the probability of being readmitted within 30 days based on a mixed-effects logistic regression model with a service line random effect, adjusting for age, sex, and race/ethnicity. For ASA class of no disease or mild systemic disease, due to model instability, estimates based on logistic regression without service line random effect.

<sup>d</sup>Denotes adjusted hazard ratio for all-cause mortality based on a Cox proportional hazards regression model with the baseline hazard function stratified by service line, adjusting for age, sex, and race/ethnicity.

**Supplementary TABLE ST5.** Discrimination for all-cause mortality, 30-day readmission, and need post-acute care services based on the electronic Frailty Index (eFI)

| Outcome                           | Model    | C-statistic |
|-----------------------------------|----------|-------------|
| All-cause mortality               | eFI only | 0.62        |
| All-cause mortality               | eFI plus | 0.75        |
| 30-day readmission                | eFI only | 0.60        |
| 30-day readmission                | eFI plus | 0.66        |
| Need for Post-Acute Care Services | eFI only | 0.59        |
| Need for Post-Acute Care Services | eFI plus | 0.71        |

Post-acute care services includes being discharged to transitional care facility or being discharged home with a need home health services. eFI plus model includes age, sex, race/ethnicity, American Society of Anesthesiologists class, and service line as covariates, in addition to the eFI. C-statistics based on 10-fold cross-validation
